# Supplementary material for: Expression, Purification and Characterization of a Novel Rusticyanin from the Psychrotolerant Acidithiobacillus ferrivorans
Source: MDPI journal article supplement (doi:10.3390/separations10080448), 2023-08-13
Supplement: s1 [file s1]

## Supplementary Materials

# Expression, Purification and Characterization of a Novel Rusticyanin from the Psychrotolerant *Acidithiobacillus ferrivorans*

Yuandong Liu \*, Lixiang Chen, Xiangdong Shangguan, Jingying Ouyang, Jiayu He, Kan Wang, Yan Tong, Runlan Yu, Weimin Zeng, Xueling Wu, Li Shen and Guanzhou Qiu

Key Laboratory of Biohydrometallurgy of Ministry of Education, School of Minerals Processing and Bioengineering, Central South University, Changsha 410083, China; lixche@126.com (L.C.); xiangdongsg@sina.cn (X.S.); jingyoy@yeah.net (J.O.); jiayuhe3328@126.com (J.H.); dlwqw126@126.com (K.W.); qq3461567793@163.com (Y.T.); yrl715@sina.com (R.Y.); zengweimin1024@126.com (W.Z.); wxlcsu@csu.edu.cn (X.W.); lishen@csu.edu.cn (L.S.); gzhqiu@sina.cn (G.Q.)

\* Correspondence: yuandong\_liu@csu.edu.cn; Tel.: +86-731-88877472

Text S1. The Specific primers used as a template for PCR amplification of the sequence area containing the type-C rusticyanin gene

The Specific primers used as a template for polymerase chain reaction (PCR) for amplification of the sequence area containing the type-C rusticyanin gene were designed according to the whole genome sequence of *A. ferrivorans* SS3 using the Primer Premier 5.0 software.

The forward primer was 5' -CCAATCCGGCATGAGACTTC-3' , start from -58 to -38 site in the upstream of 5' terminal of the *rus* gene at locus 0470.

The reverse primer was 5' - ACTTCCGTTTCAACCATGGC-3' , start from 147 to 127 site in the downstream of 3' terminal of the *rus* gene at locus 0470.

Table S1. The different residues and their property differences for the type-C rusticyanin from *A. ferrivorans* SS3 comparing to the type-A from *A. ferrooxidans* ATCC 23270 and the type-B from *A. ferrooxidans* JCM 3865, respectively. The different amino acid residues are identified from the sequence alignment of rusticyanins shown as Figure S1. The amino acid residue positions are determined according the built molecular structure of the type-C rusticyanin from *A. ferrivorans* SS3 shown as Figure 6a. The hydrophobicity differences between amino acid residues are computed based on the hydrophobicity values in the Kyte and Doolittle hydrophobicity values [31]. The net charge differences at pH 2.0 between amino acid residues are computed according to the pKa values in the initial pKa values for standard amino acids [32].

| Type-C rusticyanin from<br><i>A. ferrivorans</i> SS3 |          | Type-A rusticyanin from<br><i>A. ferrooxidans</i> ATCC 23270 |                           |                             | Type-B rusticyanin from<br><i>A. ferrooxidans</i> JCM 3865 |                           |                             |
|------------------------------------------------------|----------|--------------------------------------------------------------|---------------------------|-----------------------------|------------------------------------------------------------|---------------------------|-----------------------------|
| Amino acid                                           | Position | Amino acid                                                   | Hydrophobicity difference | Charge difference at pH 2.0 | Amino acid                                                 | Hydrophobicity difference | Charge difference at pH 2.0 |
| <b>Thr1</b>                                          | surface  | Gly1                                                         | -0.3                      | 0                           | Ala1                                                       | -2.5                      | 0                           |
| Pro2                                                 | surface  | Thr2                                                         | -0.9                      | 0                           |                                                            |                           |                             |
| Ser6                                                 | surface  | Thr6                                                         | -0.1                      | 0                           |                                                            |                           |                             |
| <b>Ser9</b>                                          | surface  | Glu9                                                         | 2.7                       | 0                           | Met9                                                       | -2.7                      | 0                           |
| Leu18                                                | surface  | Met18                                                        | 1.9                       | 0                           |                                                            |                           |                             |
| <b>Val20</b>                                         | surface  | Glu20                                                        | 7.7                       | 0                           | Ala20                                                      | 2.4                       | 0                           |
| Ser23                                                | surface  | Thr23                                                        | -0.1                      | 0                           |                                                            |                           |                             |
| <b>Glu25</b>                                         | surface  | Lys25                                                        | 0.4                       | -1                          | Lys25                                                      | 0.4                       | -1                          |
| Lys29                                                | surface  | Asp29                                                        | -0.4                      | 1                           |                                                            |                           |                             |
| Ile56                                                | buried   | Val56                                                        | 0.3                       | 0                           |                                                            |                           |                             |
| Val59                                                | surface  | Lys59                                                        | 8.1                       | -1                          |                                                            |                           |                             |
| Asp65                                                | surface  | Glu65                                                        | 0                         | 0                           |                                                            |                           |                             |
| Ile74                                                | buried   | Val74                                                        | 0.3                       | 0                           |                                                            |                           |                             |
| Phe87                                                | buried   |                                                              |                           |                             | Leu87                                                      | -1                        | 0                           |
| <b>Asn101</b>                                        | surface  | Val101                                                       | -7.7                      | 0                           | Val101                                                     | -7.7                      | 0                           |
| <b>Lys103</b>                                        | surface  | Asp103                                                       | -0.4                      | 1                           | Asn103                                                     | -0.4                      | 1                           |
| Val106                                               | surface  |                                                              |                           |                             | Ile106                                                     | -0.3                      | 0                           |
| Asp117                                               | surface  |                                                              |                           |                             | Ser117                                                     | -2.7                      | 0                           |
| Lys119                                               | surface  |                                                              |                           |                             | Gly119                                                     | -3.5                      | 1                           |
| His128                                               | surface  |                                                              |                           |                             | Arg128                                                     | 1.3                       | 0                           |
| Thr130                                               | surface  |                                                              |                           |                             | Ala130                                                     | -2.5                      | 0                           |
| <b>Total difference</b>                              |          | <b>15</b>                                                    | <b>11.5</b>               | <b>0</b>                    | <b>12</b>                                                  | <b>-19.2</b>              | <b>1</b>                    |

Table S2. Gene contexts of the rusticyanin genes in *A. ferrivorans* SS3 [17] and *A. ferrooxidans*. All involved sequences are from the public sequence database of NCBI (National Center for Biotechnology Information) ([www.ncbi.nlm.nih.gov](http://www.ncbi.nlm.nih.gov) (accessed on 30 June 2023)). The gene background information of *rus* genes from *A. ferrooxidans* SS3 was from the whole genome sequence of NCBI accession NC\_015942. The gene background information of the *rusA* from *A. ferrooxidans* ATCC 23270 is from the whole genome sequence of NCBI accession NC\_011761. The gene background information of the *rusB* from *A. ferrooxidans* 3865 was from the sequence of NCBI accession AB094633 and reported by Kazuhiro Sasaki et.al [13,33].

| locus                                                    | name               | length     | annotation                                                            |
|----------------------------------------------------------|--------------------|------------|-----------------------------------------------------------------------|
| <i>rus</i> operon from <i>A. ferrivorans</i> SS3         |                    |            |                                                                       |
| 1872                                                     | <i>cyc2</i>        | 1458       | cytochrome c                                                          |
| 1871                                                     | <i>cyc1</i>        | 690        | cytochrome c class I                                                  |
| 1870                                                     | <i>orf</i>         | 552        | hypothetical cupredoxin family protein                                |
| 1869                                                     | <i>coxB</i>        | 765        | cytochrome c oxidase subunit II                                       |
| 1868                                                     | <i>coxA</i>        | 1884       | cytochrome c oxidase subunit I                                        |
| 1867                                                     | <i>coxC</i>        | 555        | cytochrome c oxidase, aa3-type subunit III                            |
| 1866                                                     | <i>coxD</i>        | 195        | cytochrome c oxidase, aa3-type subunit IV                             |
| 1865                                                     |                    | 141        | hypothetical protein                                                  |
| <b>1864</b>                                              | <b><i>rusA</i></b> | <b>564</b> | <b>type-A rusticyanin</b>                                             |
| 1863                                                     |                    | 954        | hypothetical protein                                                  |
| <i>A. ferrivorans</i> SS3                                |                    |            |                                                                       |
| 1717                                                     |                    | 480        | hypothetical protein                                                  |
| <b>1718</b>                                              | <b><i>rusB</i></b> | <b>570</b> | <b>type-B Rusticyanin</b>                                             |
| 1719                                                     |                    | 333        | hypothetical protein                                                  |
| 1720                                                     | <i>dinB</i>        | 1200       | DNA polymerase IV                                                     |
| 1721                                                     | <i>abrB</i>        | 240        | SpoVT/AbrB like domain-containing protein                             |
| 1722                                                     | <i>pilT</i>        | 411        | PilT protein domain-containing protein                                |
| <i>A. ferrivorans</i> SS3                                |                    |            |                                                                       |
| 0467                                                     | <i>phd</i>         | 243        | prevent-host-death family protein                                     |
| 0468                                                     | <i>pilT</i>        | 396        | PilT protein domain-containing protein                                |
| 0469                                                     | <i>cusF</i>        | 345        | heavy metal efflux system protein, copper binding periplasmic protein |
| <b>0470</b>                                              | <b><i>rusC</i></b> | <b>570</b> | <b>type-C rusticyanin</b>                                             |
| 0471                                                     | <i>orf1</i>        | 300        | hypothetical protein                                                  |
| 0472                                                     | <i>orf2</i>        | 408        | hypothetical protein                                                  |
| <i>rus</i> operon from <i>A. ferrooxidans</i> ATCC 23270 |                    |            |                                                                       |
| 3153                                                     | <i>cyc2</i>        | 1458       | cytochrome c                                                          |
| 3152                                                     | <i>cyc1</i>        | 693        | cytochrome c class I                                                  |
| 3151                                                     | <i>orf</i>         | 552        | hypothetical cupredoxin family protein                                |
| 3150                                                     | <i>coxB</i>        | 765        | cytochrome c oxidase subunit II                                       |
| 3149                                                     | <i>coxA</i>        | 1884       | cytochrome c oxidase subunit I                                        |
| 3148                                                     | <i>coxC</i>        | 555        | cytochrome c oxidase, aa3-type subunit III                            |
| 3147                                                     | <i>coxD</i>        | 195        | cytochrome c oxidase, aa3-type subunit IV                             |
| <b>3146</b>                                              | <b><i>rusA</i></b> | <b>564</b> | <b>type-A rusticyanin</b>                                             |

---

*A. ferrooxidans JCM 3865*

***orf*** hypothetical protein

***rusB*** 570 **type-B rusticyanin**

---

|                   |                                                                   |     |
|-------------------|-------------------------------------------------------------------|-----|
|                   | └-----SignalP (34)-----┐ └-----Lateral Belt (35)-----┘            |     |
| RusC_fv_SS3       | MNTQNKVMTNNGRYYAAGLSAILAATLGITTAMATPLDTSWKSATLPQVKALLVKDSGEVSGK   | 63  |
| RusB2_Af_JCM3865  | MNTQIKPTMHKGRHIAAGLSTILAAALGISTAMAAPLDTSWKMATLPQVKALLAKDSGKVS     | 63  |
| RusB_Af_IF014246  | -----HKGRHVAAGLSTILAAALGISTAMAAPLDTSWKMATLPQVKALLAKDSGKVS         | 54  |
| RusB1_Af_JCM3865  | -----HKGRHVAAGLSTILAAALGISTAMAAPLDTSWKMATLPQVKALLAKDSGKVS         | 54  |
| RusB_Af_JCM7811   | -----PTMHKGRHVAAGLSTILAAALGISTAMAAPLDTSWKMATLPQVKALLAKDSGKVS      | 57  |
| RusB_fv_SS3       | MNTQIKPTMHKGRYIAAGLSTVLAAALGMSTAMAAPLDTSWKMATLPQVKALLAKDSGTVSGK   | 63  |
| RusA_fv_SS3       | MNT--QTKMQKNWYVSVGAAAVLAATVGMGTAMAGTLDSSWKEATLPQVKAMLQKDTGKVS     | 61  |
| RusA_Af_JCM3863   | -----KKNWYVTVGAAAAAATVGMGTAMAGTLDTTWKEATLPQVKAMLEKDTGKVS          | 54  |
| RusA_Af_ATCC33020 | --MYTQNTMKKNWYVTVGAAAAAATVGMGTAMAGTLDSTWKEATLPQVKAMLEKDTGKVS      | 61  |
| RusA_Af_ATCC23270 | --MYTQNTMKKNWYVTVGAAAAAATVGMGTAMAGTLDTTWKEATLPQVKAMLEKDTGKVS      | 61  |
| RusA_Af_JCM7811   | --MYTQNTMKKNWYVTVGAAAAAATVGMGTAMAGTLDTTWKEATLPQVKAMLEKDTGKVS      | 61  |
| RusA_Af_IF014246  | --MYTQNTMKKNWYVTVGAAAAAATVGMGTAMAGTLDTTWKEATLPQVKAMLEKDTGKVS      | 61  |
|                   | ::: :::.* :: **::*: ***** **:::* *****:* **:* ***,                |     |
|                   | -----┐                                                            |     |
| RusC_fv_SS3       | TVTYSGKTVHVVAAAVLPGFPFSPFEIHDVKNPTLDIPAGATVDITFINTNKGFCHSFDITKK   | 126 |
| RusB2_Af_JCM3865  | TVTYSGKTVHVVAAAVLPGFPFSPFEIHDVKNPTLDIPAGATVDITFINTNKGFCHSLDITKK   | 126 |
| RusB_Af_IF014246  | TVTYSGKTVHVVAAAVLPGFPFSPFGIHDVKNPTLDIPAGATVDITFINTNKGFCHSLDITKK   | 117 |
| RusB1_Af_JCM3865  | TVTYSGKTVHVVAAAVLPGFPFSPFEIHDVKNPTLDIPAGANVDITFINTNKGFCHSLDITKK   | 117 |
| RusB_Af_JCM7811   | TVTYSGKTVHVVAAAVLPGFPFSPFEIHDVKNPTLDIPAGATVDITFINTNKGFCHSLDITKK   | 120 |
| RusB_fv_SS3       | TVTYSGKTVHVVAAAVLPGFPFSPFEIHDVKNPTLEIPAGATVDITFINTNKGFCHSLDITKK   | 126 |
| RusA_fv_SS3       | TVTYSGKTVHVVAAAVLPGFPFSPFEVHDKKNPTLDIPAGATVDVTFINTNKGFCHSFDITQK   | 124 |
| RusA_Af_JCM3863   | TVTYSGKTVHVVAAAVLPGFPFSPFEVHDKKNPTLEIPRGATVDVTFINTNKGFCHSFDITKK   | 117 |
| RusA_Af_ATCC33020 | TVTYSGKTVHVVAAAVLPGFPFSPFEVHDKKNPTLEIPAGATVDVTFINTNKGFCHSFDITKK   | 124 |
| RusA_Af_ATCC23270 | TVTYSGKTVHVVAAAVLPGFPFSPFEVHDKKNPTLEIPAGATVDVTFINTNKGFCHSFDITKK   | 124 |
| RusA_Af_JCM7811   | TVTYSGKTVHVVAAAVLPGFPFSPFEVHDKKNPTLEIPAGATVDVTFINTNKGFCHSFDITKK   | 124 |
| RusA_Af_IF014246  | TVTYSGKTVHVVAAAVLPGFPFSPFEVHDKKNPTLEIPAGATVDVTFINTNKGFCHSFDITKK   | 124 |
|                   | *****:*** *****:* **,**:*****:**:***:*                            |     |
|                   |                                                                   |     |
| RusC_fv_SS3       | GPPYAVMPNIIKPIVAGTGFSPVPKDGKFGYTDFTWHPTAGTYYYYVCQIPGHAATGMFGKIVVK | 189 |
| RusB2_Af_JCM3865  | GPPYAVMPVINPIIAGTGFSPVPKSGGFGYTDFTWRPAAGTYYYYVCQIPGHAATGMFGKIVVK  | 189 |
| RusB_Af_IF014246  | GPPYAVMPVIDPIIAGTGFSPVPKSGGFGYTDFTWRPAAGTYYYYVCQIPGHAATGMFG-----  | 175 |
| RusB1_Af_JCM3865  | GPPYAVMPVIDPIIAGTGFSPVPKSGGFGYTDFTWRPAAGTYYYYVCQIPGHAATGMFG-----  | 175 |
| RusB_Af_JCM7811   | GPPYAVMPVIDPIIAGTGFSPVPKSGGFGYTDFTWRPAAGTYYYYVCQIPGHAATGMFG-----  | 178 |
| RusB_fv_SS3       | GPPYAVMPAINPIIAGTGFSPVPKSGGFGYTDFTWHPTAGTYYYYVCQIPGHAATGMFGKIVVK  | 189 |
| RusA_fv_SS3       | TPPFAVMPVIDPIVAGTGFSPVPKDGKFGYTNTFWHPTAGTYYYYVCQIPGHAATGMFGKIIVK  | 187 |
| RusA_Af_JCM3863   | GPPYAVMPVIDPIVAGTGFSPVPKDGKFGYTDFTWHPTAGTYYYYVCQIPGHAATGMFG-----  | 175 |
| RusA_Af_ATCC33020 | GPPYAVMPVIDPIVAGTGFSPVPKDGKFGYTDFTWHPTAGTYYYYVCQIPGHAATGMFGKIIVK  | 187 |
| RusA_Af_ATCC23270 | GPPYAVMPVIDPIVAGTGFSPVPKDGKFGYTDFTWHPTAGTYYYYVCQIPGHAATGMFGKIVVK  | 187 |
| RusA_Af_JCM7811   | GPPYAVMPVIDPIVAGTGFSPVPKDGKFGYTDFTWHPTAGTYYYYVCQIPGHAATGMFG-----  | 182 |
| RusA_Af_IF014246  | GPPYAVMPVIDPIVAGTGFSPVPKDGKFGYTDFTWHPTAGTYYYYVCQIPGHAATGMFG-----  | 182 |
|                   | ***:**** *.*:*****.* *****:***:.*:*****:**:**:**:***              |     |

**Figure S1.** Sequence alignment of rusticyanins from *A. ferrivorans* SS3 and various *A. ferrooxidans* sources. RusC\_fv\_SS3: the type-C rusticyanin from *A. ferrivorans* SS3, locus at 0470; RusB2\_Af\_JCM3865: the type-B rusticyanin from *A. ferrooxidans* JCM 3865, Genebank accession number AB094633; RusB\_Af\_IFO14246: the type-B rusticyanin from *A. ferrooxidans* IFO 14246, Genebank accession number AB094636; RusB1\_Af\_JCM3865: the type-B rusticyanin from *A. ferrooxidans* JCM 3865, Genebank accession number AB094632; RusB\_Af\_JCM7811: the type-B Rusticyanin from *A. ferrooxidans* JCM 7811, Genebank accession number AB094635; RusB\_fv\_SS3: the type-B rusticyanin from *A. ferrivorans* SS3, locus at 1718; RusA\_fv\_SS3: the type-C rusticyanin from *A. ferrivorans* SS3, locus at 1864; RusA\_Af\_JCM3863: the type-A Rusticyanin from *A. ferrooxidans* JCM 3863, Genebank accession number AB094631; RusA\_Af\_ATCC33020: the type-A rusticyanin from *A. ferrooxidans* ATCC 33020, Genebank accession number AJ006456; RusA\_Af\_ATCC23270: the type-A rusticyanin from *A. ferrooxidans* ATCC 23270, locus at 3146 or PDB number 1CUR; RusA\_Af\_JCM7811: the type-A Rusticyanin from *A. ferrooxidans* JCM 7811, Genebank accession number AB094634; RusA\_Af\_IFO14246: the type-A rusticyanin from *A. ferrooxidans* IFO 14246, Genebank accession number AB094637;. The signal peptide sequences are in blue. The conserved residues ligated the copper factor are in red. The conserved cysteine residues are marked with \*, residues not conserved in all sequences but conserved in some sequences are marked with : or . based on the degree of conservation.

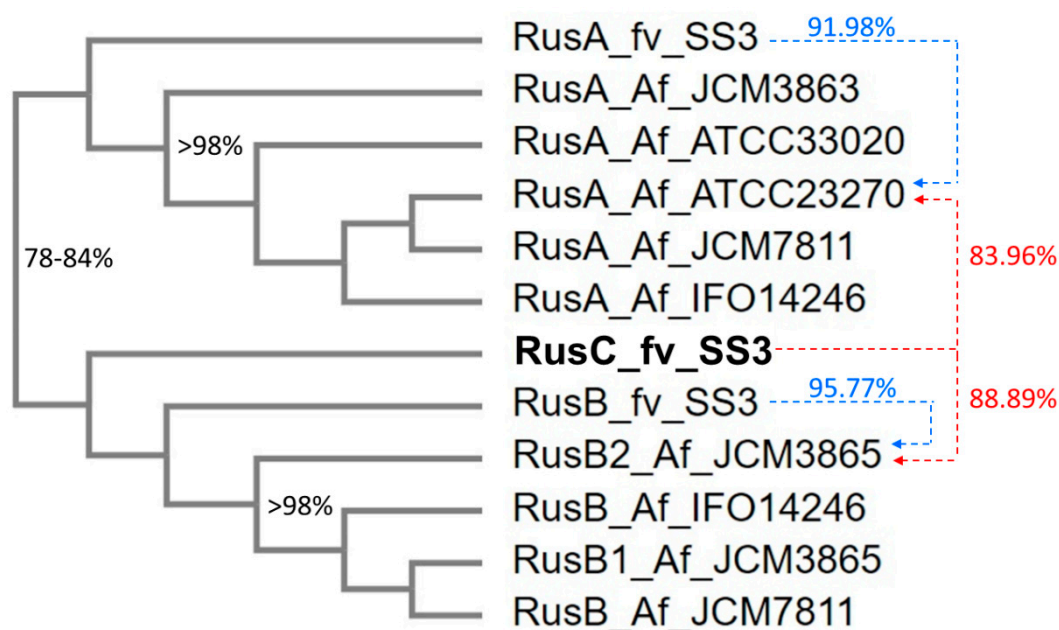

**Figure S2.** Phylogenetic tree of the rusticyanins from *A. ferrivorans* SS3 and various *A. ferrooxidans* sources according to Figure S1.
